# Supplementary material for: The ceramide synthase 2b gene mediates genomic sensing and regulation of sphingosine levels during zebrafish embryogenesis
Source: eLife journal article supplement (doi:10.7554/elife.21992), 2017-09-28
Supplement: supp [file elife-21992-supp-v2.zip]

Archive with 1 entries (1 files):
- elife_poa_e21992_Transparent_Reporting_File.pdf
